# Supplementary material for: Platinum(ii) nicotinamide complexes as receptors for oxo-anions
Source: Royal Society of Chemistry journal article supplement (doi:10.1039/b101440o), 2001-01-01
Supplement: b101440o.doc [file b101440o.doc]

Supplementary Information for:

Platinum(II) nicotinamide complexes as receptors for oxo-anions

Chantelle R. Bondy*a* Philip A. Gale**b* and Stephen J. Loeb**a*

# *Titration Plots For [PtL4][PF6]2 with Various Oxo-Anions*

[PtL4][PF6] + CF3SO3

100% CH3CN

[PtL4][PF6] + ReO4

100% CH3CN

[PtL4][PF6] + NO3

100% CH3CN

[PtL4][PF6] + HSO4

75% CH3CN – 25% DMSO

[PtL4][PF6] + CH3CO2

10% CH3CN – 90% DMSO

[PtL4][PF6] + CH3CO2

10% CH3CN – 90% DMSO

**Job Plot**
